# Supplementary material for: Lymphoma tumor burden before chimeric antigen receptor T-Cell treatment: RECIL vs. Lugano vs. metabolic tumor assessment
Source: PubMed Central journal article supplement (PMC9492918; doi:10.3389/fonc.2022.974029), 2022-09-08
Supplement: DataSheet_1.pdf [file DataSheet_1.pdf]

## SUPPLEMENTARY MATERIAL

**Supplementary Table 1: Correlation Analysis for RECIL, Lugano and Metabolic Tumor Burden.**

| TB Metric        | Tumor proportion | Spearman $\rho$ | 95% CI        | p-value |
|------------------|------------------|-----------------|---------------|---------|
| MTV vs. RECIL    | Total            | 0.744           | 0.546 - 0.863 | <0.001  |
|                  | Nodal            | 0.763           | 0.577 - 0.874 |         |
|                  | Extranodal       | 0.660           | 0.419 - 0.814 |         |
| MTV vs. Lugano   | Total            | 0.714           | 0.542 - 0.862 | <0.001  |
|                  | Nodal            | 0.852           | 0.725 - 0.923 |         |
|                  | Extranodal       | 0.749           | 0.554 - 0.866 |         |
| Lugano vs. RECIL | Total            | 0.983           | 0.967 - 0.992 | <0.001  |
|                  | Nodal            | 0.938           | 0.880 - 0.968 |         |
|                  | Extranodal       | 0.896           | 0.803 - 0.947 |         |

**Supplementary Figure 1: Different Dichotomization of Tumor Burden Metrics and Association with Progression-Free and Overall Survival.**

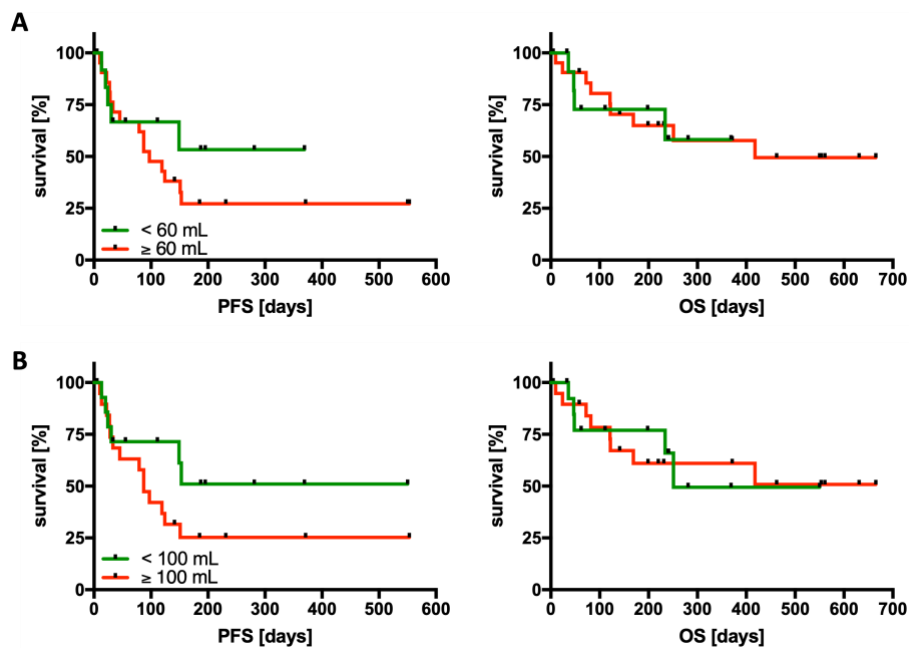

Kaplan-Meier survival curves for  $TB_{MTV}$  using the two dichotomization cut-offs 60 mL (**A**) and 100 mL (**B**) comparing PFS (on the left) and OS (on the right). Curves for patients with a tumor burden smaller than the
